# Supplementary material
Source: PubMed Central journal article supplement (PMC3623230)
Supplement: AEM.03592-12_zam999104247so1.pdf [file AEM.03592-12_zam999104247so1.pdf]

Supplemental Table S1. Statistical comparison of herd and IDS+TIO ESC<sup>R</sup> *E. coli* prevalences

| Sample type | Herd                             |                |                                              | IDS+TIO                                                                |                |                                              |                |
|-------------|----------------------------------|----------------|----------------------------------------------|------------------------------------------------------------------------|----------------|----------------------------------------------|----------------|
|             | Period                           | Number sampled | % prevalence ESC <sup>R</sup> <i>E. coli</i> | Period                                                                 | Number sampled | % prevalence ESC <sup>R</sup> <i>E. coli</i> | <i>P</i> value |
| Fecal       | Increased disease susceptibility | 128            | 5.5                                          | Increased disease susceptibility, pre-ceftiofur injection              | 49             | 8.2                                          | 0.50           |
| Fecal       | Increased disease susceptibility | 128            | 5.5                                          | Increased disease susceptibility, 3 to 8 days post-ceftiofur injection | 50             | 92.0                                         | < 0.01         |
| Fecal       | December 2009                    | 173            | 2.9                                          | December 2009                                                          | 49             | 6.1                                          | 0.38           |
| Fecal       | March 2010                       | 178            | 1.7                                          | March 2010                                                             | 48             | 0.0                                          | 1.00           |
| Fecal       | May 2010                         | 178            | 2.2                                          | May 2010                                                               | 48             | 2.1                                          | 1.00           |
| Fecal       | July 2010                        | 178            | 11.2                                         | July 2010                                                              | 48             | 2.1                                          | 0.05           |
| Hide        | Increased disease susceptibility | 128            | 11.7                                         | Increased disease susceptibility, pre-ceftiofur injection              | 49             | 8.2                                          | 0.60           |
| Hide        | Increased disease susceptibility | 128            | 11.7                                         | Increased disease susceptibility, 3 to 8 days post-ceftiofur injection | 50             | 26.0                                         | 0.02           |
| Hide        | December 2009                    | 173            | 7.5                                          | December 2009                                                          | 49             | 24.5                                         | < 0.01         |
| Hide        | March 2010                       | 178            | 1.7                                          | March 2010                                                             | 48             | 0.0                                          | 1.00           |
| Hide        | May 2010                         | 178            | 17.4                                         | May 2010                                                               | 48             | 20.8                                         | 0.67           |
| Hide        | July 2010                        | 178            | 8.4                                          | July 2010                                                              | 48             | 0.0                                          | 0.05           |
