# Supplementary material
Source: PubMed Central journal article supplement (PMC3623230)
Supplement: AEM.03592-12_zam999104247so2.pdf [file AEM.03592-12_zam999104247so2.pdf]

Supplemental Table S2. Statistical comparison of herd and Other+TIO ESC<sup>R</sup> *E. coli* prevalences

| Sample type | Herd          |                |                                              | Other+TIO     |                |                                              | <i>P</i> value |
|-------------|---------------|----------------|----------------------------------------------|---------------|----------------|----------------------------------------------|----------------|
|             | Period        | Number sampled | % prevalence ESC <sup>R</sup> <i>E. coli</i> | Period        | Number sampled | % prevalence ESC <sup>R</sup> <i>E. coli</i> |                |
| Fecal       | December 2009 | 173            | 2.9                                          | December 2009 | 33             | 3.0                                          | 1.00           |
| Fecal       | March 2010    | 178            | 1.7                                          | March 2010    | 39             | 0.0                                          | 1.00           |
| Fecal       | May 2010      | 178            | 2.2                                          | May 2010      | 43             | 0.0                                          | 1.00           |
| Fecal       | July 2010     | 178            | 11.2                                         | July 2010     | 51             | 9.8                                          | 1.00           |
| Hide        | December 2009 | 173            | 7.5                                          | December 2009 | 33             | 9.1                                          | 0.73           |
| Hide        | March 2010    | 178            | 1.7                                          | March 2010    | 39             | 2.6                                          | 0.55           |
| Hide        | May 2010      | 178            | 17.4                                         | May 2010      | 43             | 25.6                                         | 0.28           |
| Hide        | July 2010     | 178            | 8.4                                          | July 2010     | 51             | 3.9                                          | 0.37           |
